# Supplementary material for: The role of viral interaction in household transmission of symptomatic influenza and respiratory syncytial virus
Source: Springer Nature journal article supplement (doi:10.1038/s41467-025-56285-z), 2025-02-01
Supplement: MOESM1 [file 41467_2025_56285_MOESM1_ESM.pdf › 41467_2025_56285_MOESM1_ESM.pdf]

**Supplementary Table 1.** Results from individual-level mixed effects logistic regression analyses using a different transmission definition of 2-14 days following illness onset of index cases

| Characteristic                                                             | Influenza A Virus Model*** |         |          | Respiratory Syncytial Virus Model**** |         |          |
|----------------------------------------------------------------------------|----------------------------|---------|----------|---------------------------------------|---------|----------|
|                                                                            | OR (95% CI)                | z value | P value  | OR (95% CI)                           | z value | P value  |
| Category 2: Not infected with another virus, exposed to coinfecting index* | 0.41 (0.24-0.71)           | -3.172  | 0.00152  | 0.30 (0.14-0.66)                      | -3.030  | 0.002449 |
| Category 3: Infected with another virus, exposed to singly infected index* | 3.29 (1.81-5.95)           | 3.923   | 8.75e-05 | 5.51 (2.19-13.87)                     | 3.619   | 0.000296 |
| Category 4: Infected with another virus, exposed to coinfecting index*     | 1.09 (0.46-2.55)           | 0.189   | 0.85036  | 1.56 (0.55-4.43)                      | 0.827   | 0.408116 |
| Sex (male)                                                                 | 1.29 (0.90-1.84)           | 1.399   | 0.16167  | 0.86 (0.51-1.46)                      | -0.560  | 0.575661 |
| Index case <18                                                             | 2.76 (1.72-4.40)           | 4.234   | 2.29e-05 | 1.62 (0.68-3.84)                      | 1.094   | 0.273886 |
| Age 6-11**                                                                 | 0.58 (0.34-0.99)           | -2.003  | 0.04521  | 0.44 (0.21-0.93)                      | -2.162  | 0.030599 |
| Age 12-17**                                                                | 0.52 (0.27-0.99)           | -2.005  | 0.04495  | 0.23 (0.08-0.69)                      | -2.637  | 0.008368 |
| Age 18-49**                                                                | 0.52 (0.32-0.84)           | -2.659  | 0.00783  | 0.26 (0.14-0.51)                      | -3.931  | 8.45e-05 |
| Age 50+**                                                                  | 0.56 (0.21-1.49)           | 1.161   | 0.24556  | 0.43 (0.09-2.03)                      | -1.061  | 0.288671 |
| Seasonal influenza vaccination >14 days prior to exposure                  | 1.47 (0.98-2.19)           | 1.872   | 0.06127  | 1.98 (1.03-3.80)                      | 2.051   | 0.040220 |

P values were computed using two-sided asymptotic Wald tests.

\*Reference group: Category 1 - Contact not infected with another virus, exposed to singly infected index case

\*\*Reference group: Age 0-5

\*\*\*N=1745 individuals

\*\*\*\*N=1237 individuals

**Supplementary Table 2.** Results from individual-level mixed effects logistic regression analyses including additional covariate representing Ct value of the virus of interest for index cases

| Characteristic                                                             | Influenza A Virus Model*** |         |          | Influenza B Virus Model**** |         |          | Respiratory Syncytial Virus Model***** |         |          |
|----------------------------------------------------------------------------|----------------------------|---------|----------|-----------------------------|---------|----------|----------------------------------------|---------|----------|
|                                                                            | OR (95% CI)                | z value | P value  | OR (95% CI)                 | z value | P value  | OR (95% CI)                            | z value | P value  |
| Category 2: Not infected with another virus, exposed to coinfecting index* | 0.49 (0.29-0.84)           | -2.596  | 0.00944  | 0.62 (0.22-1.71)            | -0.922  | 0.356517 | 0.30 (0.14-0.64)                       | -3.123  | 0.001793 |
| Category 3: Infected with another virus, exposed to singly infected index* | 4.19 (2.36-7.44)           | 4.880   | 1.06e-06 | 2.14 (0.59-7.78)            | 1.159   | 0.246402 | 6.46 (2.70-15.48)                      | 4.186   | 2.84e-05 |
| Category 4: Infected with another virus, exposed to coinfecting index*     | 1.84 (0.84-4.03)           | 1.514   | 0.13001  | 5.49 (1.40-21.58)           | 2.440   | 0.014683 | 2.58 (1.02-6.51)                       | 2.011   | 0.044374 |
| Sex (male)                                                                 | 1.39 (1.00-1.95)           | 1.944   | 0.05185  | 0.78 (0.41-1.49)            | -0.743  | 0.457583 | 0.86 (0.52-1.41)                       | -0.606  | 0.544458 |
| Index case <18                                                             | 2.06 (1.32-3.20)           | 3.199   | 0.00138  | 1.28 (0.49-3.38)            | 0.505   | 0.613508 | 1.51 (0.64-3.54)                       | 0.945   | 0.344808 |
| Age 6-11**                                                                 | 0.59 (0.36-0.98)           | -2.028  | 0.04256  | 0.43 (0.18-1.02)            | -1.906  | 0.056611 | 0.33 (0.16-0.65)                       | -3.178  | 0.001485 |
| Age 12-17**                                                                | 0.54 (0.30-0.99)           | -1.994  | 0.04615  | 0.15 (0.04-0.52)            | -2.945  | 0.003228 | 0.15 (0.05-0.43)                       | -3.533  | 0.000411 |
| Age 18-49**                                                                | 0.54 (0.34-0.85)           | -2.642  | 0.00825  | 0.20 (0.09-0.46)            | -3.803  | 0.000143 | 0.19 (0.10-0.36)                       | -5.243  | 1.58e-07 |
| Age 50+**                                                                  | 0.54 (0.21-1.35)           | -1.328  | 0.18430  | 0.10 (0.01-0.92)            | -2.038  | 0.041586 | 0.30 (0.07-1.32)                       | -1.595  | 0.110813 |
| Seasonal influenza vaccination >14 days prior to exposure                  | 1.11 (0.77-1.62)           | 0.563   | 0.57319  | 1.27 (0.60-2.71)            | 0.624   | 0.532643 | 2.00 (1.08-3.72)                       | 2.199   | 0.027846 |
| Ct value of virus of interest for index case                               | 0.91 (0.88-0.94)           | -6.092  | 1.11e-09 | 0.97 (0.91-1.03)            | -1.010  | 0.312493 | 0.96 (0.92-1.01)                       | -1.510  | 0.131086 |

P values were computed using two-sided asymptotic Wald tests.

\*Reference group: Category 1 - Contact not infected with another virus, exposed to singly infected index case

\*\*Reference group: Age 0-5

\*\*\*N=1749 individuals

\*\*\*\*N=748 individuals

\*\*\*\*\*N=1256 individuals

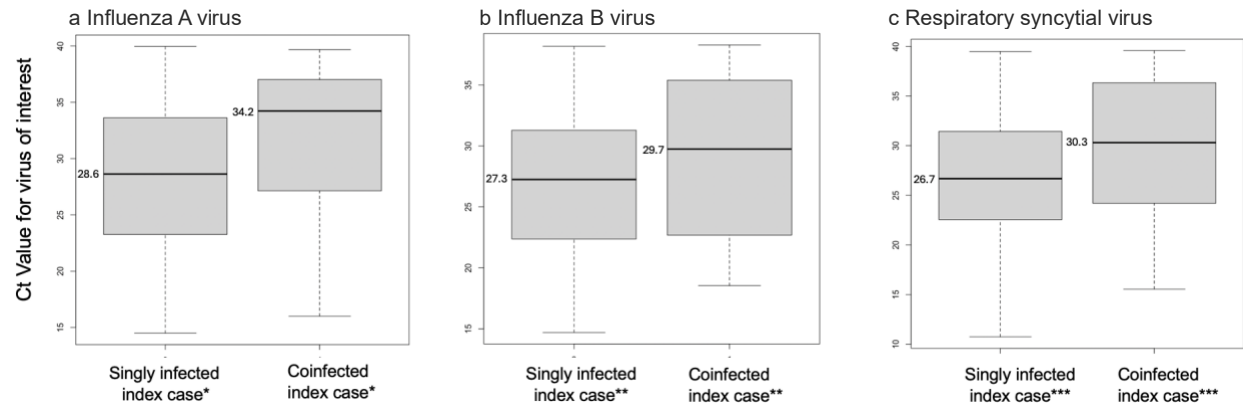

Supplementary Figure 1. **Box and whisker plot comparing Ct value of primary virus for coinfecting versus singly infected index cases involved in: a Influenza A virus illness clusters, b Influenza B virus illness clusters, and c respiratory syncytial virus illness clusters**

The distribution of Cycle threshold (Ct) values of the primary virus of interest were compared between coinfecting and singly infected index cases using Mann Whitney U tests. For each graph, the horizontal lines in the boxes represent the medians, the upper and lower limits of the boxes represent the 25th and 75th percentiles, and whiskers indicate all data points within 1.5 IQR of the upper and lower quartiles.

\* $P=3.726 \times 10^{-10}$

\*\* $P=0.009349$

\*\*\* $P=6.852 \times 10^{-5}$

**Supplementary Table 3.** Results from individual-level mixed effects logistic regression analyses stratifying by age groups 0-5, 6-17, and 18+ for influenza A virus household illness events

| Characteristic                                                             | 0-5**                 |            |             | 6-17***              |            |              | 18+****             |            |            | Total               |            |              |
|----------------------------------------------------------------------------|-----------------------|------------|-------------|----------------------|------------|--------------|---------------------|------------|------------|---------------------|------------|--------------|
|                                                                            | OR<br>(95% CI)        | z<br>value | P<br>value  | OR<br>(95% CI)       | z<br>value | P<br>value   | OR<br>(95% CI)      | z<br>value | P<br>value | OR<br>(95% CI)      | z<br>value | P<br>value   |
| Category 2: Not infected with another virus, exposed to coinfecting index* | 0.25<br>(0.08 – 0.82) | -2.289     | 0.022<br>09 | 0.42<br>(0.17-0.99)  | -1.975     | 0.048<br>241 | 0.47<br>(0.23-0.96) | -2.062     | 0.039<br>3 | 0.39<br>(0.23-0.64) | -3.722     | 0.0001<br>98 |
| Category 3: Infected with another virus, exposed to singly infected index* | 5.02<br>(1.75-14.35)  | 3.009      | 0.002<br>62 | 3.60<br>(1.35-9.58)  | 2.566      | 0.010<br>294 | 2.43<br>(0.80-7.42) | 1.564      | 0.1178     | 3.49<br>(2.02-6.03) | 4.488      | 7.18e-<br>06 |
| Category 4: Infected with another virus, exposed to coinfecting index*     | 0.60<br>(0.11-3.42)   | -0.570     | 0.568<br>83 | 3.54<br>(1.17-10.66) | 2.243      | 0.024<br>866 | 0.86<br>(0.21-3.54) | -0.209     | 0.834<br>8 | 1.33<br>(0.64-2.75) | 0.757      | 0.4493<br>38 |
| Sex (male)                                                                 | 2.01<br>(0.89 – 4.52) | 1.683      | 0.092<br>33 | 1.71<br>(0.95-3.10)  | 1.776      | 0.075<br>711 | 1.20<br>(0.73-1.97) | 0.724      | 0.469<br>2 | 1.40<br>(1.01-1.93) | 2.024      | 0.0429<br>63 |
| Index case <18                                                             | 3.80<br>(1.58 – 9.16) | 2.977      | 0.002<br>91 | 4.15<br>(1.97-8.73)  | 3.754      | 0.000<br>174 | 1.14<br>(0.59-2.21) | 0.391      | 0.695<br>6 | 2.58<br>(1.70-3.93) | 4.420      | 9.89e-<br>06 |
| Seasonal influenza vaccination >14 days prior to exposure                  | 1.28<br>(0.58 – 2.79) | 0.612      | 0.540<br>67 | 0.91<br>(0.49-1.68)  | -0.297     | 0.766<br>217 | 1.36<br>(0.79-2.35) | 1.106      | 0.268<br>8 | 1.14<br>(0.79-1.63) | 0.698      | 0.4849<br>48 |

P values were computed using two-sided asymptotic Wald tests.

\*Reference group: Category 1 - Contact not infected with another virus, exposed to singly infected index case

\*\*N=319 individuals

\*\*\*N=684 individuals

\*\*\*\*N=785 individuals

**Supplementary Table 4.** Results from individual-level mixed effects logistic regression analyses stratifying by age groups 0-17 and 18+ for respiratory syncytial virus household illness events

| Characteristic                                                             | 0-17**            |            |            | 18+***            |            |            | Total             |            |            |
|----------------------------------------------------------------------------|-------------------|------------|------------|-------------------|------------|------------|-------------------|------------|------------|
|                                                                            | OR<br>(95% CI)    | z<br>value | P<br>value | OR<br>(95% CI)    | z<br>value | P<br>value | OR<br>(95% CI)    | z<br>value | P<br>value |
| Category 2: Not infected with another virus, exposed to coinfecting index* | 0.17 (0.05-0.60)  | -2.750     | 0.00595    | 0.60 (0.23-1.58)  | -1.041     | 0.2977     | 0.28 (0.13-0.60)  | -3.313     | 0.000922   |
| Category 3: Infected with another virus, exposed to singly infected index* | 9.65 (2.38-39.12) | 3.174      | 0.00150    | 6.04 (1.26-28.94) | 2.250      | 0.0245     | 6.05 (2.55-14.35) | 4.086      | 4.38e-05   |
| Category 4: Infected with another virus, exposed to coinfecting index*     | 3.16 (0.93-10.70) | 1.851      | 0.06420    | 1.77 (0.30-10.27) | 0.635      | 0.5251     | 2.29 (0.93-5.68)  | 1.795      | 0.072647   |
| Sex (male)                                                                 | 0.67 (0.32-1.39)  | -1.072     | 0.28370    | 0.98 (0.45-2.14)  | -0.047     | 0.9628     | 0.84 (0.51-1.39)  | -0.680     | 0.496274   |
| Index case <18                                                             | 2.18 (0.72-6.55)  | 1.385      | 0.16593    | 1.30 (0.32-5.25)  | 0.373      | 0.7095     | 1.76 (0.77-4.01)  | 1.344      | 0.178939   |
| Seasonal influenza vaccination >14 days prior to exposure                  | 2.63 (1.03-6.72)  | 2.015      | 0.04386    | 1.94 (0.79-4.81)  | 1.439      | 0.1501     | 2.06 (1.11-3.81)  | 2.303      | 0.021291   |

P values were computed using two-sided asymptotic Wald tests.

\*Reference group: Category 1 - Contact not infected with another virus, exposed to singly infected index case

\*\*N=649 individuals

\*\*\*N=607 individuals

**Supplementary Table 5.** Results from individual-level mixed effects logistic regression analyses stratifying by age groups 0-5 and 6+ for respiratory syncytial virus household illness events

| Characteristic                                                             | 0-5**             |            |         | 6+***             |         |         | Total             |         |          |
|----------------------------------------------------------------------------|-------------------|------------|---------|-------------------|---------|---------|-------------------|---------|----------|
|                                                                            | OR<br>(95% CI)    | z<br>value | P value | OR<br>(95% CI)    | z value | P value | OR<br>(95% CI)    | z value | P value  |
| Category 2: Not infected with another virus, exposed to coinfecting index* | 0.14 (0.04-0.52)  | -2.956     | 0.00312 | 0.39 (0.16-0.94)  | -2.098  | 0.0359  | 0.28 (0.13-0.60)  | -3.313  | 0.000922 |
| Category 3: Infected with another virus, exposed to singly infected index* | 5.98 (1.35-26.54) | 2.354      | 0.01860 | 5.78 (1.97-16.97) | 3.194   | 0.0014  | 6.05 (2.55-14.35) | 4.086   | 4.38e-05 |
| Category 4: Infected with another virus, exposed to coinfecting index*     | 1.20 (0.34-4.23)  | 0.291      | 0.77093 | 3.36 (1.01-11.12) | 1.981   | 0.0476  | 2.29 (0.93-5.68)  | 1.795   | 0.072647 |
| Sex (male)                                                                 | 0.68 (0.28-1.64)  | -0.859     | 0.39015 | 0.94 (0.52-1.71)  | -0.189  | 0.8504  | 0.84 (0.51-1.39)  | -0.680  | 0.496274 |
| Index case <18                                                             | 2.58 (0.73-9.10)  | 1.476      | 0.14005 | 1.62 (0.58-4.51)  | 0.919   | 0.3580  | 1.76 (0.77-4.01)  | 1.344   | 0.178939 |
| Seasonal influenza vaccination >14 days prior to exposure                  | 4.26 (1.49-12.18) | 2.705      | 0.00684 | 1.41 (0.68-2.91)  | 0.933   | 0.3506  | 2.06 (1.11-3.81)  | 2.303   | 0.021291 |

P values were computed using two-sided asymptotic Wald tests.

\*Reference group: Category 1 - Contact not infected with another virus, exposed to singly infected index case

\*\*N=230 individuals

\*\*\*N=1026 individuals

**Supplementary Table 6.** Results from a multivariable regression using Poisson mixed effects models to associate household factors with the incidence of virus transmission when the index case was coinfectd with rhinovirus/enterovirus compared to singly infected with a virus of interest

| Characteristic                       | IRR (95% CI)       | z value | P value  |
|--------------------------------------|--------------------|---------|----------|
| Influenza A Virus Model*             |                    |         |          |
| Coinfected index Case                | 0.20 (0.09 – 0.43) | -4.079  | 4.53e-05 |
| No. Household Members                | 0.95 (0.77 – 1.17) | -0.506  | 0.612560 |
| Index case <18                       | 2.09 (1.37 – 3.19) | 3.405   | 0.000662 |
| Influenza B Virus Model**            |                    |         |          |
| Coinfected index Case                | 0.34 (0.07 – 1.53) | -1.405  | 0.160    |
| No. Household Members                | 1.23 (0.90 – 1.68) | 1.282   | 0.200    |
| Index case <18                       | 1.11 (0.47 – 2.60) | 0.242   | 0.809    |
| Respiratory Syncytial Virus Model*** |                    |         |          |
| Coinfected index Case                | 0.44 (0.19 – 1.01) | -1.928  | 0.0539   |
| No. Household Members                | 0.95 (0.73 – 1.24) | -0.358  | 0.7207   |
| Index case <18                       | 1.54 (0.69 – 3.42) | 1.062   | 0.2882   |

P values were computed using two-sided asymptotic Wald tests.

\*N=464 households

\*\*N=200 households

\*\*\*N=282 households

**Supplementary Table 7.** Results from individual-level mixed effects logistic regression analyses, restricted to only rhinovirus/enterovirus as the coinfecting/co-circulating viruses

| Characteristic                                                             | Influenza A Model*** |         |          | Influenza B Model**** |         |          | Respiratory Syncytial Virus Model***** |         |          |
|----------------------------------------------------------------------------|----------------------|---------|----------|-----------------------|---------|----------|----------------------------------------|---------|----------|
|                                                                            | OR (95% CI)          | z value | P value  | OR (95% CI)           | z value | P value  | OR (95% CI)                            | z value | P value  |
| Category 2: Not infected with another virus, exposed to coinfecting index* | 0.20 (0.09-0.46)     | -3.771  | 0.000163 | 0.19 (0.02-1.55)      | -1.555  | 0.119924 | 0.28 (0.10-0.79)                       | -2.401  | 0.016348 |
| Category 3: Infected with another virus, exposed to singly infected index* | 1.78 (0.76-4.15)     | 1.336   | 0.181436 | 2.61 (0.52-13.18)     | 1.161   | 0.245642 | 4.12 (1.27-13.33)                      | 2.363   | 0.018132 |
| Category 4: Infected with another virus, exposed to coinfecting index*     | 0.17 (0.02-1.44)     | -1.625  | 0.104194 | 1.85 (0.13-25.32)     | 0.459   | 0.646022 | 0.22 (0.02-3.04)                       | -1.127  | 0.259868 |
| Sex (male)                                                                 | 1.53 (1.08-2.17)     | 2.375   | 0.017530 | 0.67 (0.33-1.34)      | -1.139  | 0.254795 | 1.07 (0.63-1.83)                       | 0.252   | 0.801004 |
| Index case <18                                                             | 2.43 (1.54-3.85)     | 3.793   | 0.000149 | 1.21 (0.47-3.16)      | 0.397   | 0.691418 | 1.76 (0.77-4.01)                       | 1.315   | 0.188351 |
| Age 6-11**                                                                 | 0.49 (0.29-0.83)     | -2.659  | 0.007834 | 0.47 (0.19-1.14)      | -1.669  | 0.095026 | 0.28 (0.13-0.59)                       | -3.338  | 0.000844 |
| Age 12-17**                                                                | 0.39 (0.20-0.73)     | -2.931  | 0.003380 | 0.09 (0.02-0.47)      | -2.892  | 0.003833 | 0.09 (0.03-0.29)                       | -4.030  | 5.58e-05 |
| Age 18-49**                                                                | 0.46 (0.29-0.75)     | -3.167  | 0.001539 | 0.20 (0.09-0.49)      | -3.560  | 0.000370 | 0.14 (0.07-0.29)                       | -5.527  | 3.27e-08 |
| Age 50+**                                                                  | 0.51 (0.20-1.32)     | -1.389  | 0.164890 | 0.12 (0.01-1.12)      | -1.859  | 0.063024 | 0.12 (0.02-0.72)                       | -2.314  | 0.020661 |
| Seasonal influenza vaccination >14 days prior to exposure                  | 1.03 (0.69-1.54)     | 0.161   | 0.872396 | 1.65 (0.76-3.57)      | 1.261   | 0.207137 | 2.07 (1.05-4.08)                       | 2.090   | 0.036640 |

P values were computed using two-sided asymptotic Wald tests.

\*Reference: Category 1 - Contact not infected with another virus, exposed to singly infected index case

\*\*Reference group: Age 0-5

\*\*\*N=1523 individuals

\*\*\*\*N=667 individuals

\*\*\*\*\*N=968 individuals



**Supplementary Table 8.** Results from multivariable regression analyses using Poisson mixed effects models to associate household factors with the incidence of virus transmission when the index case was coinfectd with a human coronavirus compared to singly infected with a virus of interest

| Characteristic                       | IRR (95% CI)       | z value | P value |
|--------------------------------------|--------------------|---------|---------|
| Influenza A Virus Model*             |                    |         |         |
| Coinfectd index Case                 | 0.55 (0.29 – 1.03) | -1.868  | 0.0618  |
| No. Household Members                | 0.89 (0.73 – 1.09) | -1.093  | 0.2744  |
| Index case <18                       | 2.35 (1.53 – 3.60) | 3.911   | 9.2e-05 |
| Influenza B Virus Model**            |                    |         |         |
| Coinfectd index Case                 | 1.98 (0.74 – 5.32) | 1.352   | 0.176   |
| No. Household Members                | 1.23 (0.90 – 1.67) | 1.286   | 0.199   |
| Index case <18                       | 1.27 (0.54 – 2.96) | 0.544   | 0.587   |
| Respiratory Syncytial Virus Model*** |                    |         |         |
| Coinfectd index Case                 | 0.42 (0.16 – 1.12) | -1.734  | 0.0829  |
| No. Household Members                | 1.08 (0.83 – 1.39) | 0.577   | 0.5638  |
| Index case <18                       | 1.69 (0.76 – 3.79) | 1.283   | 0.1996  |

P values were computed using two-sided asymptotic Wald tests.

\*N=454 households

\*\*N=191 households

\*\*\*N=279 households

**Supplementary Table 9.** Results from individual-level mixed effects logistic regression analyses, restricted to only human coronaviruses as the coinfecting/co-circulating viruses \*\*\*

| Characteristic                                                             | Influenza A Virus Model**** |         |          | Influenza B Virus Model***** |         |          |
|----------------------------------------------------------------------------|-----------------------------|---------|----------|------------------------------|---------|----------|
|                                                                            | OR (95% CI)                 | z value | P value  | OR (95% CI)                  | z value | P value  |
| Category 2: Not infected with another virus, exposed to coinfecting index* | 0.30 (0.13-0.69)            | -2.850  | 0.004369 | 2.72 (0.88-8.39)             | 1.738   | 0.082278 |
| Category 3: Infected with another virus, exposed to singly infected index* | 1.87 (0.75-4.69)            | 1.333   | 0.182492 | 2.89 (0.56-14.80)            | 1.271   | 0.203673 |
| Category 4: Infected with another virus, exposed to coinfecting index*     | 5.16 (1.16-22.96)           | 2.153   | 0.031282 | -                            | -       | -        |
| Sex (male)                                                                 | 1.39 (0.98-1.96)            | 1.855   | 0.063554 | 0.78 (0.41-1.50)             | -0.742  | 0.458208 |
| Index case <18                                                             | 2.76 (1.74-4.38)            | 4.326   | 1.52e-05 | 1.40 (0.54-3.59)             | 0.695   | 0.487055 |
| Age 6-11**                                                                 | 0.47 (0.28-0.80)            | -2.787  | 0.005315 | 0.37 (0.16-0.88)             | -2.261  | 0.023790 |
| Age 12-17**                                                                | 0.44 (0.24-0.81)            | -2.640  | 0.008282 | 0.12 (0.03-0.48)             | -3.018  | 0.002541 |
| Age 18-49**                                                                | 0.43 (0.27-0.69)            | -3.496  | 0.000472 | 0.19 (0.08-0.43)             | -3.982  | 6.82e-05 |
| Age 50+**                                                                  | 0.53 (0.22-1.32)            | -1.360  | 0.173848 | 0.09 (0.01-0.81)             | -2.151  | 0.031506 |
| Seasonal influenza vaccination >14 days prior to exposure                  | 1.05 (0.71-1.55)            | 0.225   | 0.822101 | 1.58 (0.75-3.34)             | 1.200   | 0.230256 |

P values were computed using two-sided asymptotic Wald tests.

\*Reference group: Category 1 - Contact not infected with other virus, exposed to singly infected index case

\*\*Reference group: 0-5

\*\*\*The respiratory syncytial virus model did not converge

\*\*\*\*N=1479 individuals

\*\*\*\*\*N=641 individuals

**Supplementary Table 10.** Results from multivariable regression analyses using Poisson mixed effects models to associate household factors with the incidence of influenza A virus transmission when the index case was coinfectd compared to singly infected with influenza A virus, by subtype

| Characteristic            | IRR (95% CI)       | z value | <i>P</i> value |
|---------------------------|--------------------|---------|----------------|
| Influenza A H3N2 Model*   |                    |         |                |
| Coinfected index Case     | 0.54 (0.29—1.00)   | -1.954  | 0.0507         |
| No. Household Members     | 0.74 (0.58 – 0.95) | -2.366  | 0.0180         |
| Index case <18            | 1.78 (1.03 – 3.07) | 2.075   | 0.0380         |
| Influenza A H1N1 Model**  |                    |         |                |
| Coinfected index Case     | 0.91 (0.47—1.74)   | -0.299  | 0.7649         |
| No. Household Members     | 1.32 (0.96 – 1.81) | 1.716   | 0.0862         |
| Index case <18            | 2.01 (1.02 – 3.95) | 2.016   | 0.0438         |
| Grouped Influenza A Virus |                    |         |                |
| Coinfected Index Case     | 0.44 (0.29—0.66)   | -3.895  | 9.81e-05       |
| No. Household Members     | 0.91 (0.76 – 1.10) | -0.942  | 0.346          |
| Index case <18            | 2.13 (1.46 – 3.10) | 3.934   | 8.37e-05       |

*P* values were computed using two-sided asymptotic Wald tests.

\*N=301 households

\*\*N=159 households

**Supplementary Table 11.** Results from individual-level mixed effects logistic regression analyses by influenza A virus subtype

| Characteristic                                                             | H3N2***          |            |            | H1N1****          |            |            | Grouped Influenza A Virus |            |            |
|----------------------------------------------------------------------------|------------------|------------|------------|-------------------|------------|------------|---------------------------|------------|------------|
|                                                                            | OR<br>(95% CI)   | z<br>value | P<br>value | OR<br>(95% CI)    | z<br>value | P<br>value | OR<br>(95% CI)            | z<br>value | P<br>value |
| Category 2: Not infected with another virus, exposed to coinfecting index* | 0.34 (0.15-0.79) | -2.535     | 0.0113     | 0.61 (0.22-1.71)  | -0.938     | 0.34808    | 0.39 (0.23-0.64)          | -3.722     | 0.000198   |
| Category 3: Infected with another virus, exposed to singly infected index* | 4.12 (1.88-9.02) | 3.540      | 0.0004     | 3.81 (1.19-12.26) | 2.246      | 0.02471    | 3.49 (2.02-6.03)          | 4.488      | 7.18e-06   |
| Category 4: Infected with another virus, exposed to coinfecting index*     | 2.55 (0.82-7.90) | 1.618      | 0.1056     | 3.04 (0.53-17.54) | 1.244      | 0.21351    | 1.33 (0.64-2.75)          | 0.757      | 0.449338   |
| Sex (male)                                                                 | 1.39 (0.91-2.13) | 1.528      | 0.1266     | 1.59 (0.81-3.12)  | 1.340      | 0.18023    | 1.40 (1.01-1.93)          | 2.024      | 0.042963   |
| Index case <18                                                             | 2.16 (1.15-4.05) | 2.395      | 0.0166     | 3.43 (1.35-8.70)  | 2.592      | 0.00954    | 2.58 (1.70-3.93)          | 4.420      | 9.89e-06   |
| Age 6-11**                                                                 | 0.60 (0.31-1.17) | -1.501     | 0.1333     | 0.67 (0.26-1.71)  | -0.838     | 0.40184    | 0.59 (0.36-0.95)          | -2.164     | 0.030477   |
| Age 12-17**                                                                | 0.72 (0.34-1.53) | -0.857     | 0.3913     | 0.11 (0.02-0.62)  | -2.483     | 0.01302    | 0.54 (0.30-0.97)          | -2.048     | 0.040555   |
| Age 18-49**                                                                | 0.58 (0.32-1.09) | -1.701     | 0.0889     | 0.52 (0.21-1.25)  | -1.464     | 0.14309    | 0.56 (0.36-0.86)          | -2.605     | 0.009175   |
| Age 50+**                                                                  | 0.74 (0.24-2.30) | -0.517     | 0.6053     | 0.42 (0.05-3.20)  | -0.839     | 0.40163    | 0.62 (0.26-1.51)          | -1.044     | 0.296570   |
| Seasonal influenza vaccination >14 days prior to exposure                  | 0.95 (0.57-1.57) | -0.198     | 0.8430     | 1.04 (0.47-2.32)  | 0.107      | 0.91483    | 1.14 (0.79-1.63)          | 0.698      | 0.484948   |

P values were computed using two-sided asymptotic Wald tests.

\*Reference group: Category 1 - Contact not infected with another virus, exposed to singly infected index case

\*\* Reference group: Age 0-5

\*\*\*N=1014 individuals

\*\*\*\*N=516 individuals

**Supplementary Table 12.** Comparison of results from multivariable regression analyses using Poisson mixed effects models to associate household factors with the incidence of transmission when the index case was coinfectd compared to singly infected when person-time at risk was included in the model versus not

| Virus                          | Excluding Person-Time at Risk<br>(Sensitivity Analysis) |         |          | Including Person-Time at Risk<br>(Main Analysis) |         |          |
|--------------------------------|---------------------------------------------------------|---------|----------|--------------------------------------------------|---------|----------|
|                                | $\beta$ Coefficient                                     | z value | P value  | $\beta$ Coefficient                              | z value | P value  |
| Influenza A Virus*             | -0.64228                                                | -3.360  | 0.000780 | -0.83218                                         | -3.895  | 9.81e-05 |
| Influenza B Virus**            | -0.11148                                                | -0.291  | 0.77108  | -0.16803                                         | -0.423  | 0.672    |
| Respiratory Syncytial Virus*** | -0.6481                                                 | -2.593  | 0.00952  | -0.67788                                         | -2.548  | 0.0108   |

P values were computed using two-sided asymptotic Wald tests.

\*N=546 households

\*\*N=231 households

\*\*\*N=370 households

**Supplementary Table 13.** Summary of alternative statistical models considered but not selected

| Analysis                        | Type of Model / Variable                                                                         | Rationale for Not Selecting                                                                                                                                                                                                                                                                                                                                                                                                                                                                                                                                                                                                                                                                                                                                                                                                                                                                                                                                                                                                                                          |
|---------------------------------|--------------------------------------------------------------------------------------------------|----------------------------------------------------------------------------------------------------------------------------------------------------------------------------------------------------------------------------------------------------------------------------------------------------------------------------------------------------------------------------------------------------------------------------------------------------------------------------------------------------------------------------------------------------------------------------------------------------------------------------------------------------------------------------------------------------------------------------------------------------------------------------------------------------------------------------------------------------------------------------------------------------------------------------------------------------------------------------------------------------------------------------------------------------------------------|
| Household-level                 | Poisson GEE                                                                                      | This model produced similar estimates to the mixed effects models with wider confidence intervals. For IAV, the IRR was slightly smaller and the 95% confidence interval (CI) was tighter for the mixed effects model [0.45 (95% CI: 0.30 – 0.68) compared to 0.53 (95% CI: 0.27 – 1.03) for the GEE model]. For IBV, the IRR and CI were similar for the mixed effects model and the GEE model. For RSV, the IRR was similar and CI slightly tighter: 0.51 (95% CI: 0.30 – 0.86) for mixed effects compared to 0.50 (95% CI: 0.26 – 0.98) for the GEE model.                                                                                                                                                                                                                                                                                                                                                                                                                                                                                                        |
| Household-level                 | Negative Binomial                                                                                | We tested a negative binomial model for the household-level analyses because there was overdispersion of the Poisson model for IAV with a dispersion ratio of 0.999 using ' <i>dispersion_glmmer()</i> '. Underdispersion was detected for the negative binomial, with a dispersion ratio of 0.939. Both models resulted in similar estimates: IRR 0.45 (95% CI: 0.29 – 0.68) for the negative binomial vs. IRR 0.44 (95% CI: 0.29 – 0.66) for the Poisson. For the IBV and RSV analyses, no overdispersion was detected in the Poisson models.                                                                                                                                                                                                                                                                                                                                                                                                                                                                                                                      |
| Household-level                 | Zero-inflated                                                                                    | No zero-inflation was detected in the Poisson models for the IAV, IBV, and RSV analyses and therefore, the use of zero-inflated models was not appropriate.                                                                                                                                                                                                                                                                                                                                                                                                                                                                                                                                                                                                                                                                                                                                                                                                                                                                                                          |
| Individual-level                | Mixed effects logistic regression with interaction term for sex*age group of susceptible contact | This model did not converge.                                                                                                                                                                                                                                                                                                                                                                                                                                                                                                                                                                                                                                                                                                                                                                                                                                                                                                                                                                                                                                         |
| Individual-level                | Mixed effects logistic regression with interaction term for sex*age group of index case          | This model did not converge.                                                                                                                                                                                                                                                                                                                                                                                                                                                                                                                                                                                                                                                                                                                                                                                                                                                                                                                                                                                                                                         |
| Individual- and household-level | Age of the index case as a continuous (versus dichotomous variable)                              | We ran all of the models (household- and individual-level for all three viruses of interest) using a continuous variable for age of the index case and received very similar estimates and confidence intervals for our main predictors. We also compared model performance using AIC and BIC for each analysis, comparing the model with age as a continuous variable versus the one with age as a dichotomous variable. For all but two models (4/6) the AIC and BIC were quite similar. For the IAV household-level Poisson mixed effects models, the model that included age as a continuous variable had lower AIC and BIC than the model with age as a dichotomous variable. On the other hand, for the household-level RSV analysis, the AIC and BIC were lower for the model that included age as a dichotomous variable. We have chosen to include the dichotomous variable to improve interpretability (e.g., “having an index case under the age of 18 was associated with an increased risk of transmission...”) and maintain consistency across models. |

**Supplementary Table 14. Model Equations**

Model equation 1: estimating the household risk of virus transmission within households ( $j$ ) with coinfecting index cases while accounting for total person-time at risk. Co-infection versus single infection among index cases was the primary predictor ( $X_1$ ), and the outcome,  $\mu_j$ , represents the expected number of virus transmissions for household  $j$ . This model was adjusted for household size ( $X_2$ ) and age (<18 and  $\geq 18$  years) of the index case ( $X_3$ ). Random intercepts ( $b_{0j}$ ) were included to account for household clustering.

$$\ln(\mu_j) = \beta_0 + \beta_1 X_{1j} + \beta_2 X_{2j} + \beta_3 X_{3j} + b_{0j} \ln(\text{person days at risk})$$

Model equation 2: estimating an individual's ( $i$ ) risk of infection when multiple viruses circulated simultaneously within their household ( $j$ ). The main predictor ( $X_1$ ), was a four-category variable with different combinations of exposure to a coinfecting index case and infection with a virus other than the primary virus of interest. Random intercepts were included to account for household clustering ( $b_{0j}$ ). The outcome was acquisition of the virus of interest ( $Y$ ). The age (<18 and  $\geq 18$  years) of the index case was included as a household-level covariate ( $X_2$ ). Individual-level covariates included sex ( $X_3$ ), age group (0-5, 6-11, 12-17, 18-49, and 50+) ( $X_4$ ), and vaccination status.

$$\text{Logit}(\Pr(Y_{ij})) = \beta_0 + \beta_1 X_{1ij} + \beta_2 X_{2j} + \beta_3 X_{3ij} + \beta_4 X_{4ij} + \beta_5 X_{5ij} + b_{0j}$$

**Supplementary Table 15.** Source data for Figure 3a – Viruses coinfecting with influenza A virus

| Virus                       | Index Cases | Secondary Cases | Non-cases | Total |
|-----------------------------|-------------|-----------------|-----------|-------|
| Adenovirus                  | 15          | 7               | 10        | 32    |
| Bocavirus                   | 6           | 1               | 5         | 12    |
| Human coronaviruses         | 56          | 12              | 40        | 108   |
| Human metapneumovirus       | 11          | 3               | 7         | 21    |
| Influenza B virus           | 6           | 2               | 16        | 24    |
| Parainfluenza virus         | 7           | 3               | 3         | 13    |
| Parechovirus                | 2           | 0               | 2         | 4     |
| Respiratory syncytial virus | 21          | 6               | 15        | 42    |
| Rhinovirus/enterovirus      | 61          | 11              | 63        | 135   |



**Supplementary Table 16.** Source data for Figure 3b – Viruses coinfecting with influenza B virus

| Virus                       | Index Cases | Secondary Cases | Non-cases | Total |
|-----------------------------|-------------|-----------------|-----------|-------|
| Adenovirus                  | 6           | 2               | 1         | 9     |
| Bocavirus                   | 0           | 0               | 1         | 1     |
| Human coronaviruses         | 13          | 4               | 11        | 28    |
| Human metapneumovirus       | 4           | 1               | 5         | 10    |
| Influenza A virus           | 8           | 0               | 7         | 15    |
| Parainfluenza virus         | 4           | 0               | 1         | 5     |
| Parechovirus                | 0           | 0               | 0         | 0     |
| Respiratory syncytial virus | 5           | 2               | 1         | 8     |
| Rhinovirus/enterovirus      | 23          | 4               | 21        | 48    |

**Supplementary Table 17.** Source data for Figure 3c – Viruses coinfecting with respiratory syncytial virus

| Virus                  | Index Cases | Secondary Cases | Non-cases | Total |
|------------------------|-------------|-----------------|-----------|-------|
| Adenovirus             | 21          | 3               | 6         | 30    |
| Bocavirus              | 7           | 1               | 4         | 12    |
| Human coronaviruses    | 43          | 11              | 38        | 92    |
| Human metapneumovirus  | 15          | 0               | 5         | 20    |
| Influenza A virus      | 22          | 5               | 14        | 41    |
| Influenza B virus      | 4           | 2               | 10        | 16    |
| Parainfluenza virus    | 9           | 0               | 6         | 15    |
| Parechovirus           | 9           | 1               | 1         | 11    |
| Rhinovirus/enterovirus | 52          | 10              | 34        | 96    |
